# Supplementary material for: A sildenafil cocrystal based on acetylsalicylic acid exhibits an enhanced intrinsic dissolution rate
Source: Royal Society of Chemistry journal article supplement (doi:10.1039/c3ce42013b), 2013-10-10
Supplement: c3ce42013b.pdf [file c3ce42013b.pdf]

## Electronic Supplementary Information (ESI)

# A sildenafil cocrystal based on acetylsalicylic acid exhibits an enhanced intrinsic dissolution rate

Miroslav Žegarac,<sup>a</sup> Edislav Lekšić,<sup>a</sup> Primož Šket,<sup>b,c</sup> Janez Plavec,<sup>b,c</sup> Maja Devčić Bogdanović,<sup>a</sup> Dejan-Krešimir Bučar,<sup>\*d</sup> Miljenko Dumić,<sup>e</sup> Ernest Meštrović<sup>\*a</sup>

<sup>a</sup> PLIVA Croatia, TAPI R&D, Prilaz Baruna Filipovića 25, HR-10000 Zagreb, Croatia.

E-mail: Ernest.Mestrovic@pliva.com

<sup>b</sup> Slovenian NMR Center, National Institute of Chemistry, Hajdrihova 19, SI-1000 Ljubljana, Slovenia

<sup>c</sup> EN-FIST Center of Excellence, SI-1000 Ljubljana, Slovenia

<sup>d</sup> Department of Chemistry, University College London, 20 Gordon Street, London WC1H 0A, UK.

E-mail: d.bucar@ucl.ac.uk

<sup>e</sup> Department of Biotechnology, University of Rijeka, R. Matejčić 2, HR-51000 Rijeka, Croatia

1. Materials
2. Crystallographic studies
3. Thermal analyses
4. Spectroscopic studies
5. Intrinsic-dissolution-rate studies
6. HPLC analysis
7. References

## **1. Materials**

Sildenafil of 98% purity was obtained from an in-house source and used without further purification. Acetylsalicylic acid (98%, Merck) and 2-propanol were used as received.

## **2. Crystallographic studies**

### **2.1. Powder X-ray diffraction**

X-ray powder diffraction patterns were obtained by using a *Phillips X'Pert Pro* diffractometer equipped with an *X'celerator RTMS* detector using Ni-filtered  $\text{CuK}_\alpha$  radiation ( $\lambda = 1.5406 \text{ \AA}$ ) generated at 45 kV and 40 mA. The sample (~150 mg) was placed on a circular sample holder (16 mm diameter, PW1811/16, PW1811/00). Data collection was conducted at ambient conditions using the *X'Pert Data Collector* program<sup>1</sup> (v. 2.2h). The scans were performed in the continuous mode (gonio scan axis) in the  $3\text{--}40^\circ 2\theta$  range with a step size of  $0.017^\circ$  and a step time of 40 s. The acquired data was analysed using the *XPertDataView* program.<sup>1</sup>

### **2.2 Single-crystal X-ray diffraction**

Single crystal diffraction data was collected using a *Nonius KappaCCD* diffractometer (being equipped with a 95mm CCD camera on a  $\kappa$ -goniostat) and monochromated  $\text{CuK}_\alpha$  radiation ( $\lambda = 1.54184 \text{ \AA}$ , graded mirrors). The diffraction data of **1** was collected at 293 K.

Data collection, cell refinement and data reduction were performed using *Collect*<sup>2</sup> and *HKL Scalepack/Denzo*,<sup>3</sup> respectively. The structures were solved by direct methods and refined on  $F^2$  by weighted full-matrix least squares. *SHELX*<sup>4</sup> was used to solve and refine the crystal structures. All non-hydrogen atoms were refined anisotropically. Hydrogen atoms belonging to  $\text{C}(sp^2)$  and  $\text{C}(sp^3)$  carbon atoms were placed in geometrically idealized positions with isotropic displacement parameters and fixed at 1.2 times of  $U_{\text{eq}}$  for methylene carbon atoms and 1.5 times  $U_{\text{eq}}$  for methyl groups. Hydrogen atoms belonging to O and N atoms were placed in geometrically idealized positions with isotropic displacement parameters and fixed at 1.5 times of  $U_{\text{eq}}$  of the corresponding atoms.

The investigated single crystal of compound **1** was a small-sized, brittle and poorly diffracting needle. Numerous datasets were collected on single crystals from different batches, whereof the one of the highest quality is reported herein. Attempts to collect a dataset of higher quality at low temperatures failed, as the fine needles tend to crack under the  $\text{N}_2$  flow.

## **3. Thermal analyses**

### **3.1. Thermogravimetric analysis**

TGA profiles were generated in range of  $25\text{--}420^\circ\text{C}$  using *TA Instruments Hi-Res TGA 2950*. About 10 mg of the sample was placed in an open platinum pan. The mass loss of the sample was determined as a function of temperature. The resulting data were analyzed using the *TA Instruments Universal Analysis 2000* software (v. 4.7A). The TGA thermograms of solids **1** and **2** are shown on Figures S1 and S2, respectively.

### 3.1. Differential-scanning calorimetry (DSC)

DSC thermograms were acquired in the temperature range of 25–250 °C using a TA Q1000 instrument. About 2–5 mg of the sample was encapsulated in a pierced Al pan. The same empty pan was used as reference. A nitrogen purge at 50 mL/min was employed. The obtained data was examined using the TA Instruments Universal Analysis 2000 software (v. 4.7A). The DSC thermograms of solids **1** and **2** are shown on Figures S1 and S2, respectively.

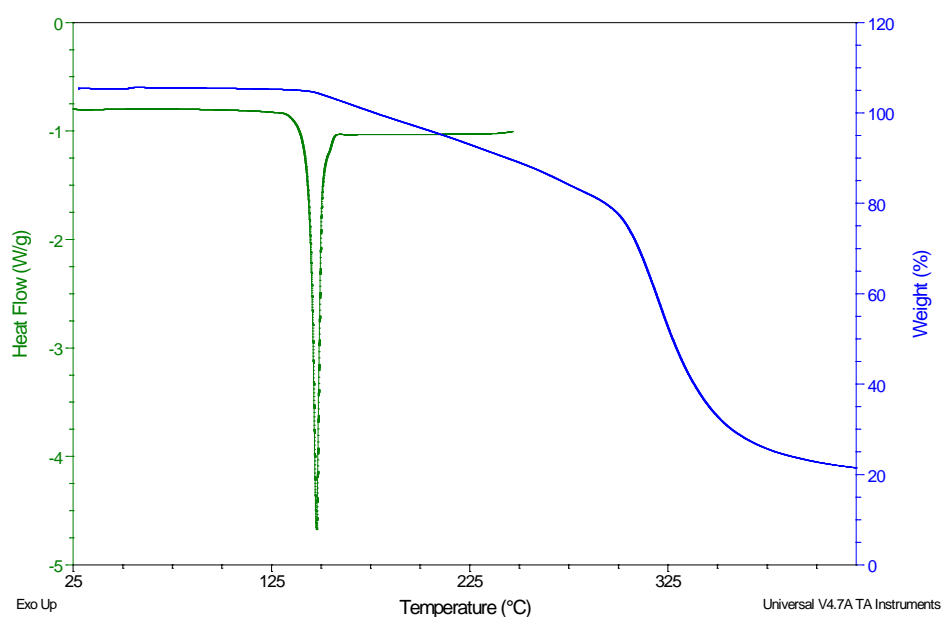

**Figure S1.** DSC (blue) and TG (green) thermograms of solid **1** ( $t_{\text{melting}} = 148.0$  °C).

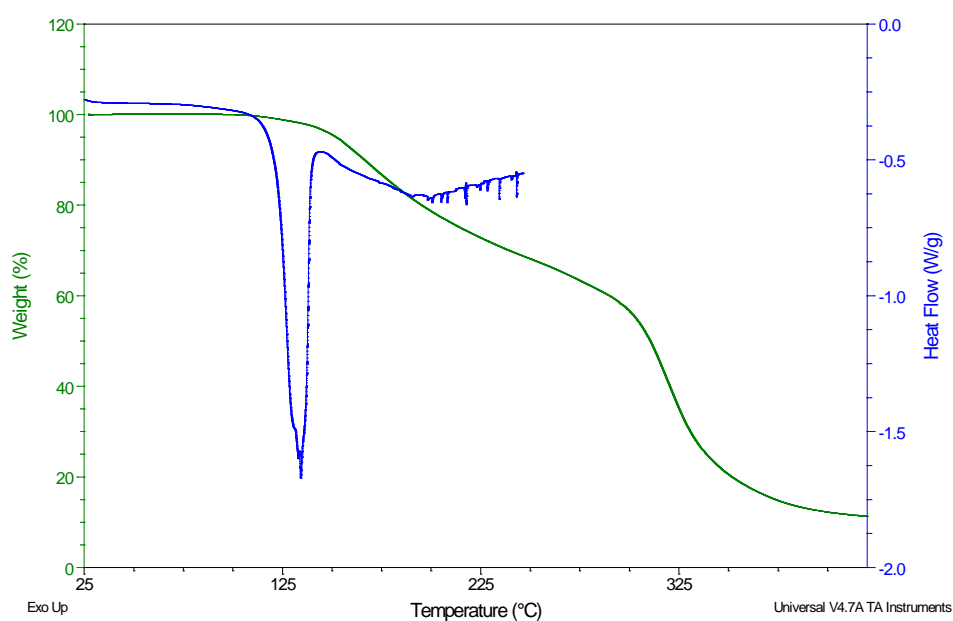

**Figure S2.** DSC (blue) and TG (green) thermograms of solid **2** ( $t_{\text{melting}} = 134.3$  °C).

## 4. Spectroscopic studies

### 4.1. FT-IR spectroscopy

FT-IR of solids **1** and **2** were recorded on a *Nicolet 6700* spectrophotometer and measured in the range of 4000-400  $\text{cm}^{-1}$  using the KBr-pellet technique (sample concentration: 1 mg in 10 mg of KBr). The data analysis was performed using the *Omnic* program (v. 8.0).

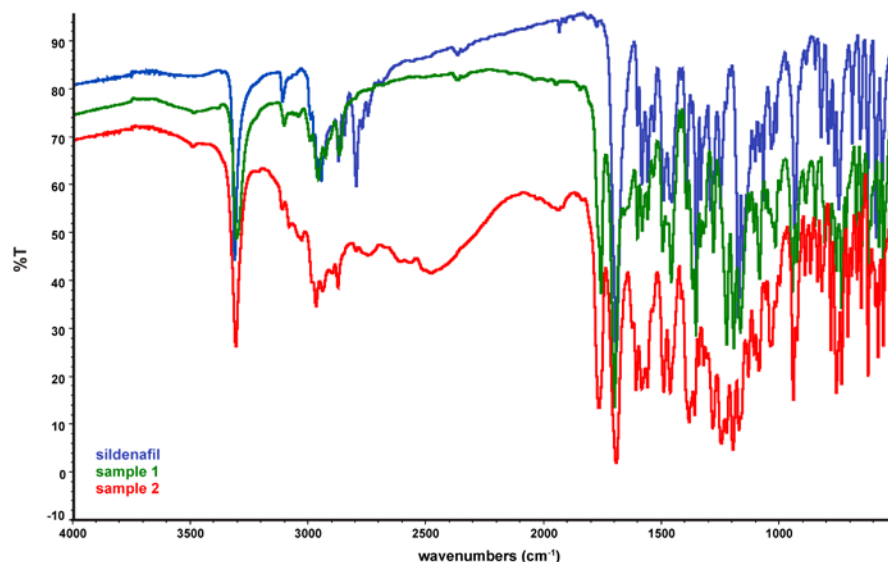

**Figure S3.** FT-IR spectra of sildenafil (blue), solid **1** (green) and solid **2** (red).

### 4.1. $^1\text{H}$ , $^{13}\text{C}$ and $^{15}\text{N}$ CP-MAS NMR spectroscopy

The  $^1\text{H}$  and  $^{13}\text{C}$  NMR spectra of samples **1** and **2** were recorded on an *Agilent Technologies* NMR System 600 MHz NMR spectrometer equipped with a 3.2 mm NB Double Resonance HX MAS Solids Probe. The Larmor frequencies of proton and carbon nuclei were 599.62 and 150.77 MHz, respectively. The  $^1\text{H}$  MAS NMR spectra were externally referenced using adamantane. The  $^{13}\text{C}$  CP-MAS NMR spectra were externally referenced using hexamethylbenzene. Samples were spun at the magic angle with 20 kHz during  $^1\text{H}$  measurement and with 16 kHz during  $^{13}\text{C}$  measurement. The  $^1\text{H}$  spectra were acquired within 16 scans using a spin echo sequence with a repetition delay of 10 s. The pulse sequence used for acquiring the  $^{13}\text{C}$  spectra was a standard cross-polarization MAS pulse sequence with high-power proton decoupling during acquisition. The repetition delay in all  $^{13}\text{C}$  data acquisitions was 5 s and the number of scans was between 500 and 13770, depending on the sample.

The  $^{15}\text{N}$  NMR spectra of solids **1** and **2** were also recorded on an *Agilent Technologies* NMR System 600 MHz NMR spectrometer, which was equipped with a 3.2 mm NB Double Resonance HX MAS Solids Probe. The Larmor frequencies of proton and nitrogen nuclei were 599.62 and 60.77 MHz, respectively. The  $^{15}\text{N}$  CP-MAS NMR spectra were externally referenced using ammonium sulphate ( $\delta$  -355.7 ppm, as compared to nitromethane at  $\delta$  0.0 ppm). The samples were spun at the magic angle with 10 kHz during all  $^{15}\text{N}$  measurement. The pulse sequence used for  $^{15}\text{N}$  data acquisition was a standard cross-polarization MAS pulse sequence with high-power proton decoupling during acquisition. The repetition delay in all  $^{15}\text{N}$  experiments was 5 s and the number of scans was between 4430 and 27400, depending on the sample.

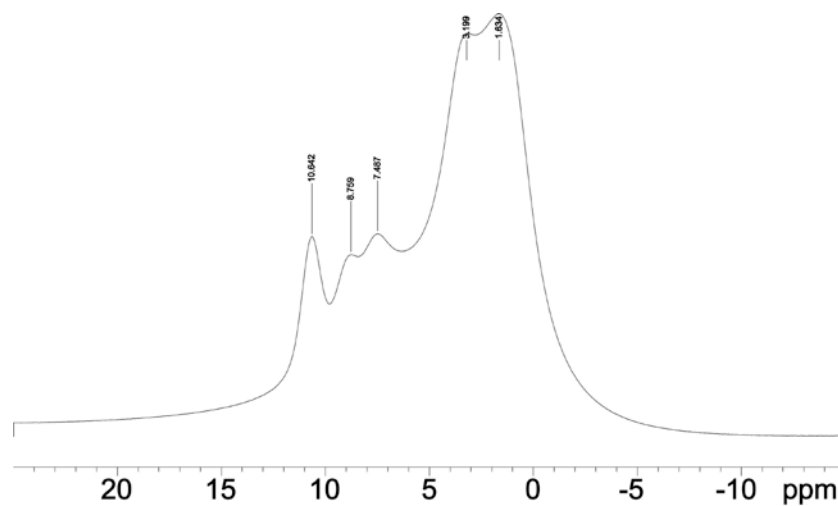

**Figure S4.**  $^1\text{H}$  MAS NMR spectrum of sildenafil.

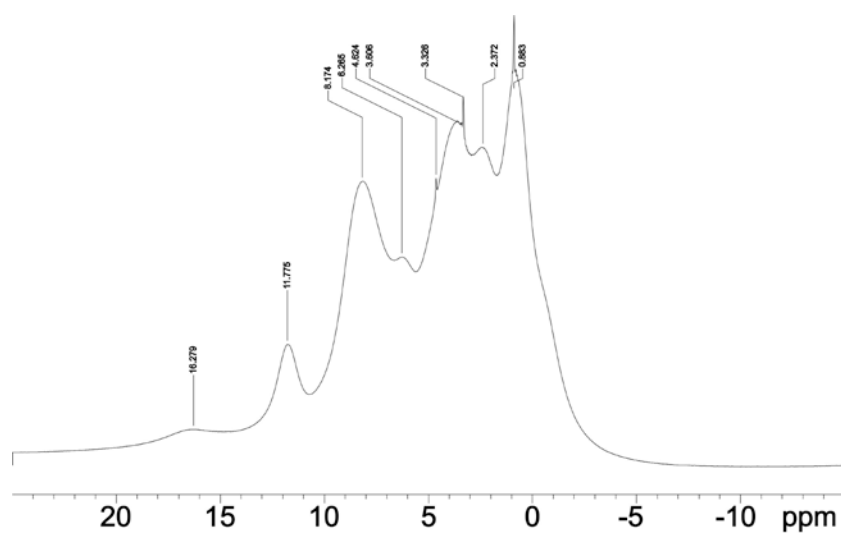

**Figure S5.**  $^1\text{H}$  MAS NMR spectrum of sample 1.

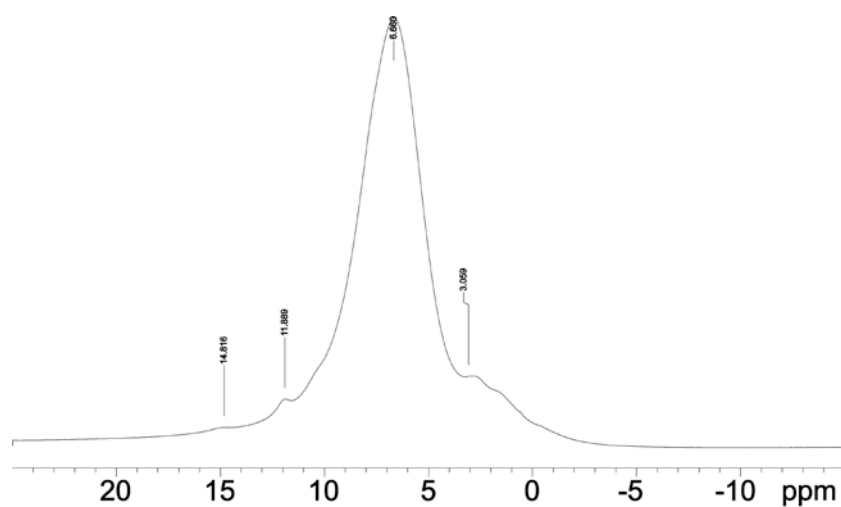

**Figure S6.**  $^1\text{H}$  MAS NMR spectrum of sample 2.

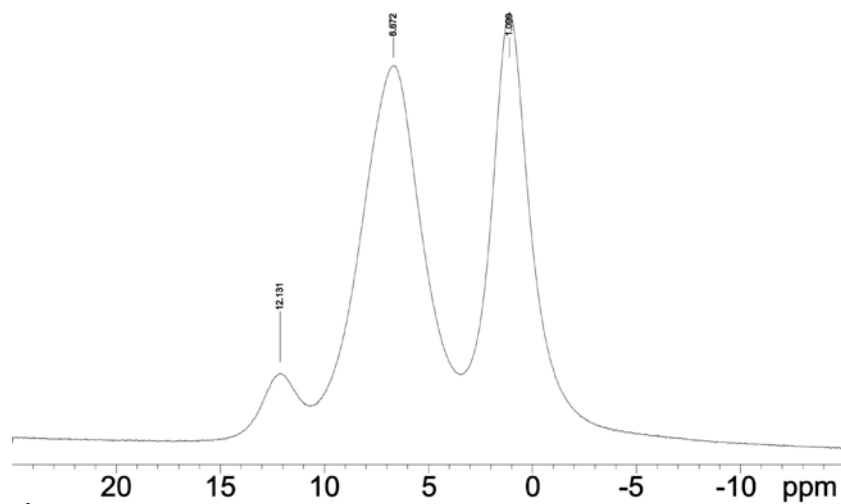

**Figure S7.**  $^1\text{H}$  MAS NMR spectrum of acetylsalicylic acid.

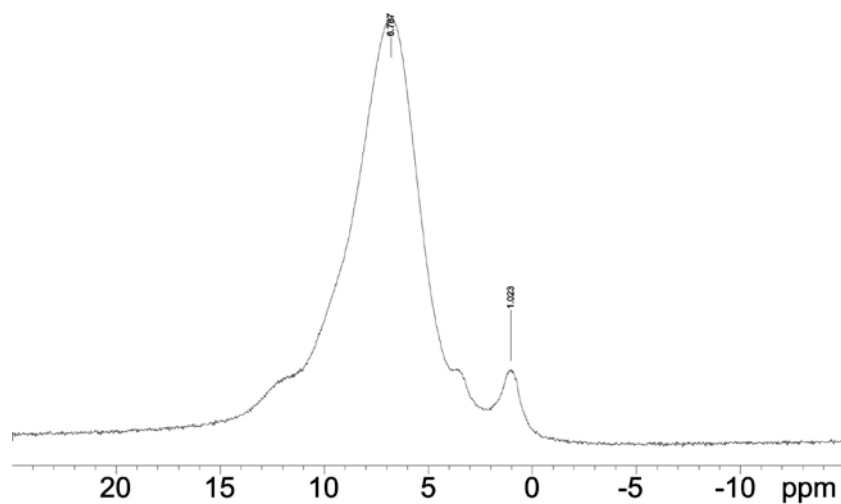

**Figure S8.**  $^1\text{H}$  MAS NMR spectrum of salicylic acid.

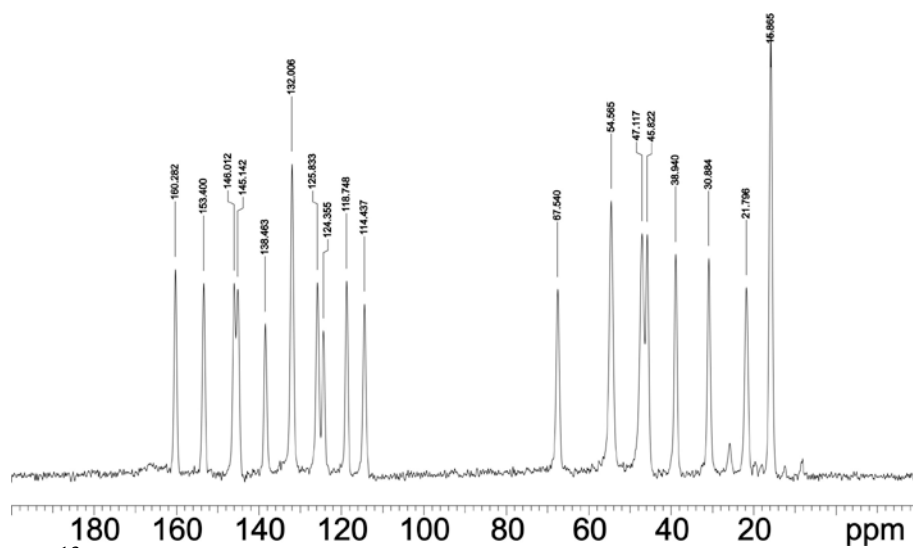

**Figure S9.**  $^{13}\text{C}$  CP-MAS NMR spectrum of sildenafil.

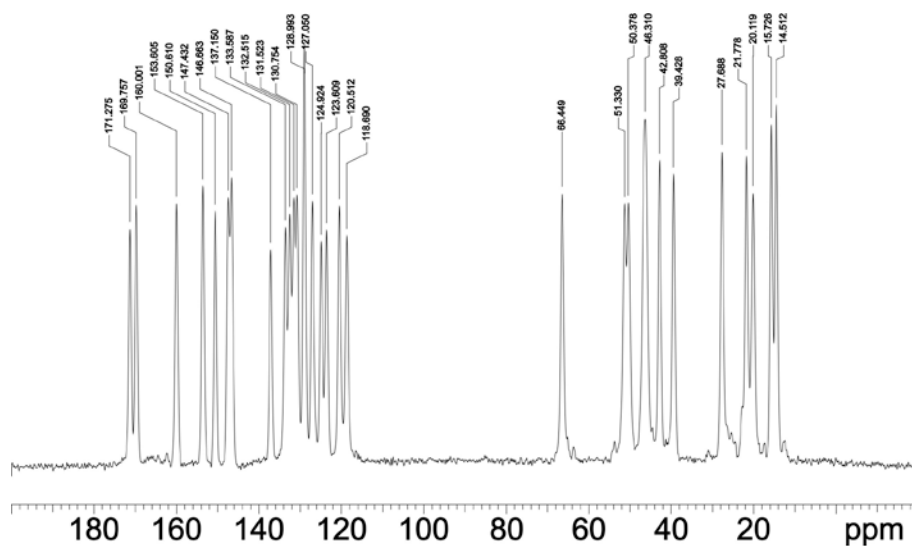

**Figure S10.**  $^{13}\text{C}$  CP-MAS NMR spectrum of sample 1.

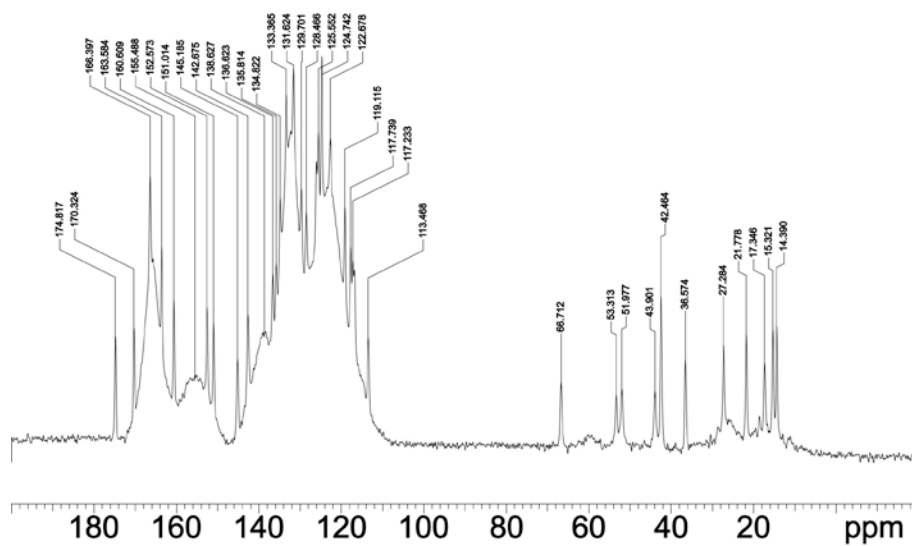

**Figure S11.**  $^{13}\text{C}$  CP-MAS NMR spectrum of sample 2.

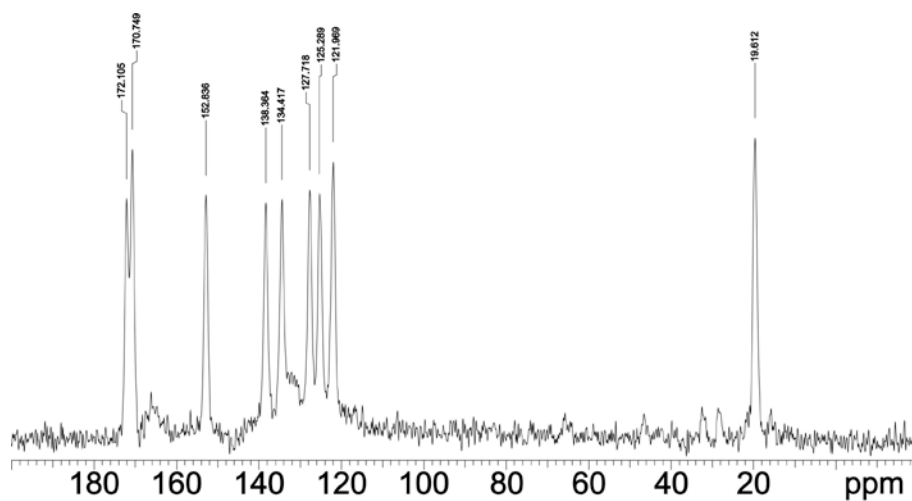

**Figure S12.**  $^{13}\text{C}$  CP-MAS NMR spectrum of acetylsalicylic acid.

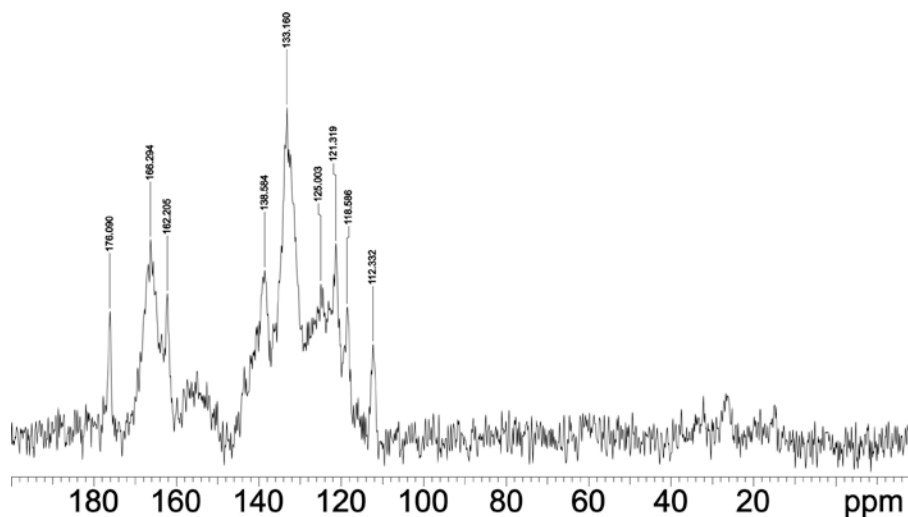

**Figure S13.**  $^{13}\text{C}$  CP-MAS NMR spectrum of salicylic acid.

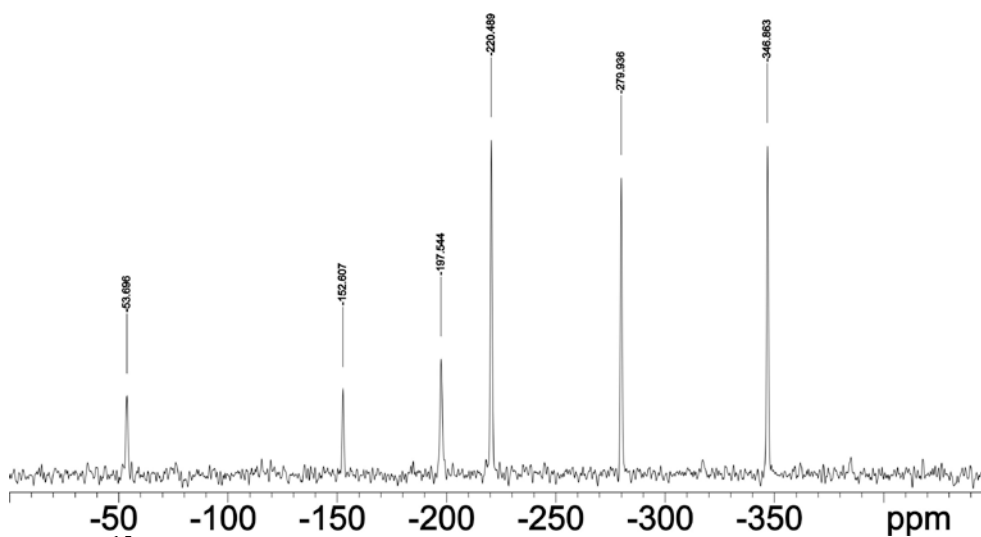

**Figure S14.**  $^{15}\text{N}$  CP-MAS NMR spectrum of sildenafil.

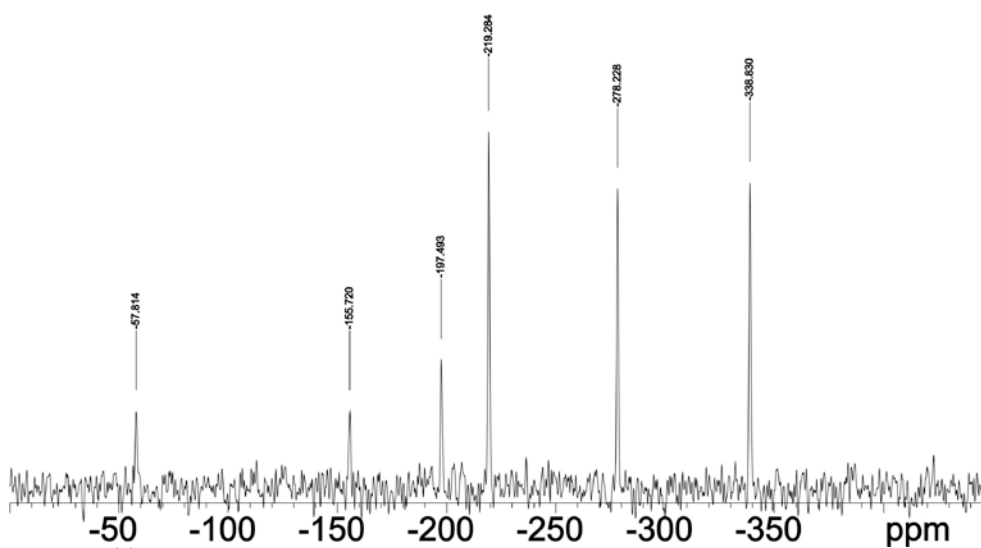

**Figure S15.**  $^{15}\text{N}$  CP-MAS NMR spectrum of sample 1.

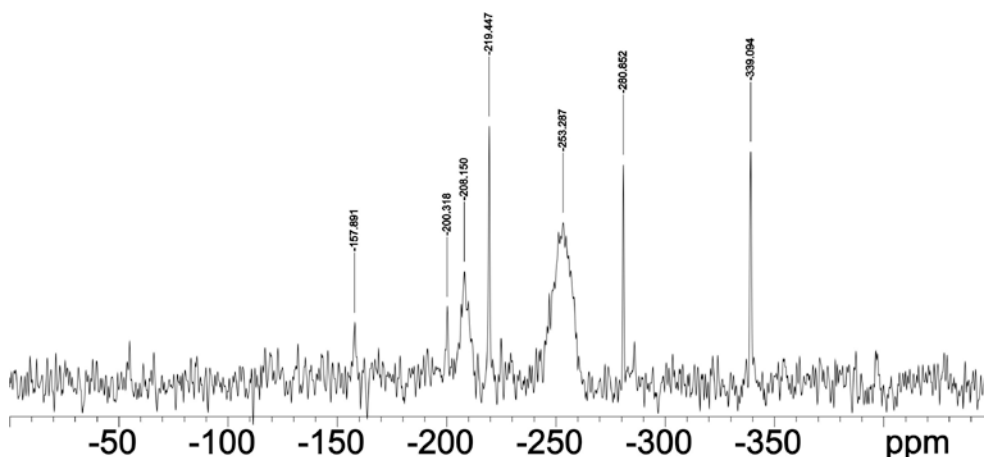

Figure S16.  $^{15}\text{N}$  CP-MAS NMR spectrum of sample 2.

## 5. Intrinsic dissolution rate studies

Intrinsic dissolution rates were examined on PHARMA TEST dissolution apparatus (*VanKel* intrinsic dissolution apparatus) at 100 rpm. In a typical experiment, 100 mg of the solid sample was pressed into a pellet at 1.5 MT for 1 min. IDRs were examined in three different media, namely degassed water, degassed water with 1.2% NaCl and a pH=1.2 buffer. The volume of the dissolution media was 900 mL. The obtained solutions were collected in five-minute intervals, and analyzed using a *Carry* 50 spectrophotometer at 292 nm.

## 6. HPLC analyses

The HPLC analysis of compound **2** was performed on an *Agilent* (1100 Series) instrument that was fitted with a *Phenomenex Intersil ODS-3* column (150x4.60mm, 5  $\mu\text{m}$  particle size). The mobile phase was composed of a  $\text{KH}_2\text{PO}_4$  buffer (pH=2.3; 65%) and acetonitrile (35%). The components of solid **2** were eluted over 8 min at rate of 1  $\text{mL min}^{-1}$ . The column was kept at a temperature of 40°C. The separation of the solid's components was monitored in real time by a *Carry* 50 spectrophotometer at 292 nm.

The composition of solid **2** was determined by calculating retention factors for acetylsalicylic acid and salicylic acid. A typical HPLC chromatogram for solid **2** is shown in Fig. S17, while the data used to determine the composition of solid **2** is shown in Table S1. and S2.

**Table S1.** Standard solution of sildenafil, acetylsalicylic acid and salicylic acid used to determine the composition of solid **2** via HPLC analyses.

| compound             | m/mg  | V/mL | c/mg $\text{mL}^{-1}$ | area    | RF             |
|----------------------|-------|------|-----------------------|---------|----------------|
| sildenafil           | 51.22 | 50   | 1.024                 | 4610.06 | <b>4500.25</b> |
| acetylsalicylic acid | 53.23 | 50   | 1.065                 | 2665.56 | <b>2503.81</b> |
| salicylic acid       | 50.37 | 50   | 1.007                 | 6498.41 | <b>6450.67</b> |

**Table S2.** Composition of solid **2**, as determined *via* HPLC analyses.

| batch | m/mg  | V/mL | c/mg mL <sup>-1</sup> | compound             | area    | RF      | assay*/%    |
|-------|-------|------|-----------------------|----------------------|---------|---------|-------------|
| 1     | 31.36 | 25   | 1.25                  | acetylsalicylic acid | 794.90  | 633.69  | <b>25.3</b> |
|       |       |      |                       | salicylic acid       | 1556.74 | 1241.03 | <b>19.2</b> |
| 2     | 26.91 | 25   | 1.08                  | acetylsalicylic acid | 682.65  | 634.20  | <b>25.3</b> |
|       |       |      |                       | salicylic acid       | 1316.57 | 1223.13 | <b>19.0</b> |
| 3     | 21.04 | 25   | 0.84                  | acetylsalicylic acid | 499.82  | 593.89  | <b>23.7</b> |
|       |       |      |                       | salicylic acid       | 1017.29 | 1208.75 | <b>18.7</b> |
| 4     | 27.98 | 25   | 1.12                  | acetylsalicylic acid | 745.83  | 666.39  | <b>26.6</b> |
|       |       |      |                       | salicylic acid       | 1240.61 | 1108.48 | <b>17.2</b> |
| 5     | 25.74 | 25   | 1.03                  | acetylsalicylic acid | 627.40  | 609.36  | <b>24.3</b> |
|       |       |      |                       | salicylic acid       | 1318.43 | 1280.53 | <b>19.9</b> |

\* theoretical w/w%: sildenafil – 59.9%, **acetylsalicylic acid – 22.7%**, **salicylic acid – 17.4%**

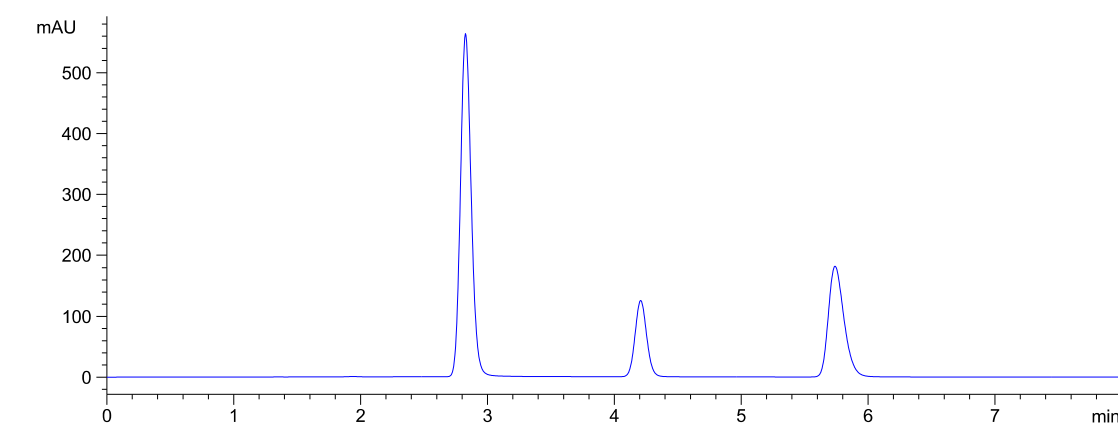

**Figure S17.** A typical HPLC chromatogram of solid **2**.

## 7. References

1. PANalytical B. V., Almelo, The Netherlands, 2006.
2. R. W. W. Hooft, Nonius BV, Delft, The Netherlands, 1998.
3. Z. Otwinowski, W. Minor in *Methods in Enzymology*, ed. C. W. Carter Jr and R. M. Sweet, 1997, Vol. 276 (*Macromolecular Crystallography*, Part A), pp. 307-326.
4. G. M. Sheldrick, *Acta Cryst.*, 2008, **A64**, 112-122.
